# Supplementary material for: Detrimental Effects of Helium Ion Irradiation on Cognitive Performance and Cortical Levels of MAP-2 in B6D2F1 Mice
Source: PubMed Central journal article supplement (PMC5979430; doi:10.3390/ijms19041247), 2018-04-20
Supplement: ijms-19-01247-s001.pdf [file ijms-19-01247-s001.pdf]

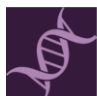

## Supplementary Figure Legends

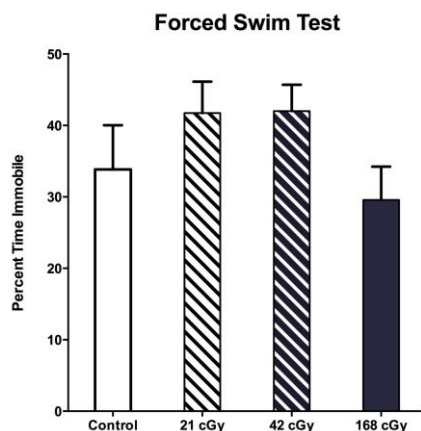

**Figure S1.** No significant effects of  $^4\text{He}$  ion irradiation on the percent time spent immobile in the forced swim test. Control:  $n = 13$  mice; 21 cGy:  $n = 23$  mice; 42 cGy:  $n = 20$  mice; 168 cGy:  $n = 16$  mice.

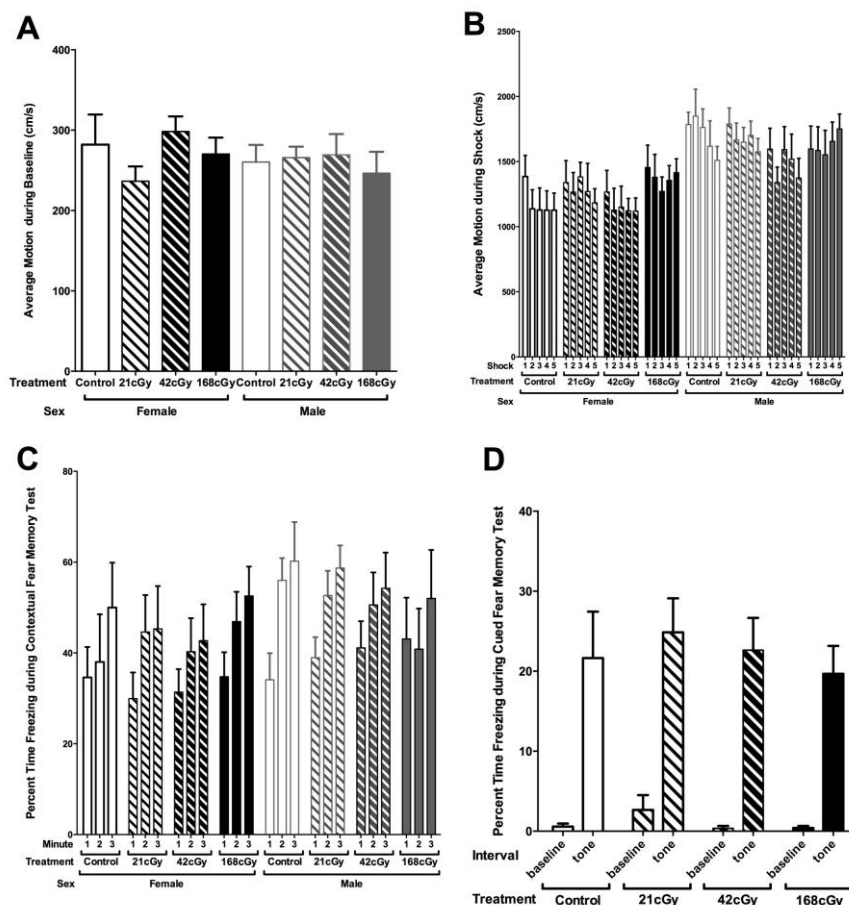

**Figure S2.** No significant effects of  $^4\text{He}$  ion irradiation on contextual or cued fear learning or memory. **A.** No effects of Helium ion irradiation on activity levels prior to the first tone. **B.** No effect of Helium ion irradiation on response to the shock. There was an effect of sex on response to the shock ( $F(1,64) = 19.489$ ,  $p < 0.001$ ), with higher motion levels in males than females. **C.** No effects of He ion irradiation on contextual fear memory. **D.** No effects of Helium ion irradiation on cued fear memory. Control:  $n = 13$  mice; 21 cGy:  $n = 23$  mice; 42 cGy:  $n = 20$  mice; 168 cGy:  $n = 16$  mice.
